# Supplementary material for: Elicitation from virus-naive individuals of cytotoxic T lymphocytes directed against conserved HIV-1 epitopes
Source: Springer Nature journal article supplement (doi:10.1186/1476-9433-5-1), 2006-05-04
Supplement: Additional file 2 [file 1476-9433-5-1-s2.pdf]

**Table 1S. Statistics on peptide responses in ELISPOT assay for the three subgroups of HIV-1-infected subjects vs. controls**

|       | a_inf |     |        |        | c_inf. |     |        |        | normal |        |        |        | no HAART |     |        |       | p1     | p2     | p3      |
|-------|-------|-----|--------|--------|--------|-----|--------|--------|--------|--------|--------|--------|----------|-----|--------|-------|--------|--------|---------|
|       | N     | Min | Median | Max    | N      | Min | Median | Max    | N      | Min    | Median | Max    | N        | Min | Median | Max   |        |        |         |
| pool1 | 26    | 0.0 | 20.8   | 1193.3 | 11     | 0.0 | 0.0    | 1201.7 | 10     | 933.3  | 1763.3 | 5546.7 | 8        | 0.0 | 156.7  | 408.3 | 0.0001 | 0.0004 | <0.0001 |
| pool2 | 26    | 0.0 | 17.5   | 1298.3 | 11     | 0.0 | 5.0    | 861.7  | 10     | 1040.0 | 1743.3 | 4346.7 | 8        | 0.0 | 131.7  | 445.0 | 0.0001 | 0.0004 | <0.0001 |
| pool3 | 26    | 0.0 | 23.3   | 1473.3 | 11     | 0.0 | 3.3    | 1031.7 | 10     | 693.3  | 1950.0 | 5560.0 | 8        | 0.0 | 236.7  | 370.0 | 0.0001 | 0.0004 | <0.0001 |
| pool4 | 26    | 0.0 | 7.5    | 1368.3 | 11     | 0.0 | 0.0    | 1041.7 | 10     | 1093.3 | 1590.0 | 5240.0 | 8        | 0.0 | 7.5    | 513.3 | 0.0001 | 0.0004 | <0.0001 |
| pool5 | 26    | 0.0 | 5.8    | 1458.3 | 11     | 0.0 | 0.0    | 1191.7 | 10     | 226.7  | 1673.3 | 7826.7 | 8        | 0.0 | 15.0   | 553.3 | 0.0002 | 0.0008 | <0.0001 |

p1: c\_infection vs. normal, p2: no HAART vs. normal, p3: a\_infection vs. normal where a=subjects identified during acute infection, c = subjects with advanced chronic disease, and subjects "no HAART" are controlling viremia without therapy

note 1: Wilcoxon-Rank-Sum test is used for p-values

note 2: to take multiple comparisons into account, the significance level is set to 0.0167 (not 0.05). All comparisons are significant at the 0.0167 level.
